# Supplementary material for: CD73 expression and clinical significance in human metastatic melanoma
Source: PubMed Central journal article supplement (PMC6003551; doi:10.18632/oncotarget.25426), 2018-06-01
Supplement: oncotarget-09-26659-s001.pdf [file oncotarget-09-26659-s001.pdf]

## CD73 expression and clinical significance in human metastatic melanoma

### SUPPLEMENTARY MATERIALS

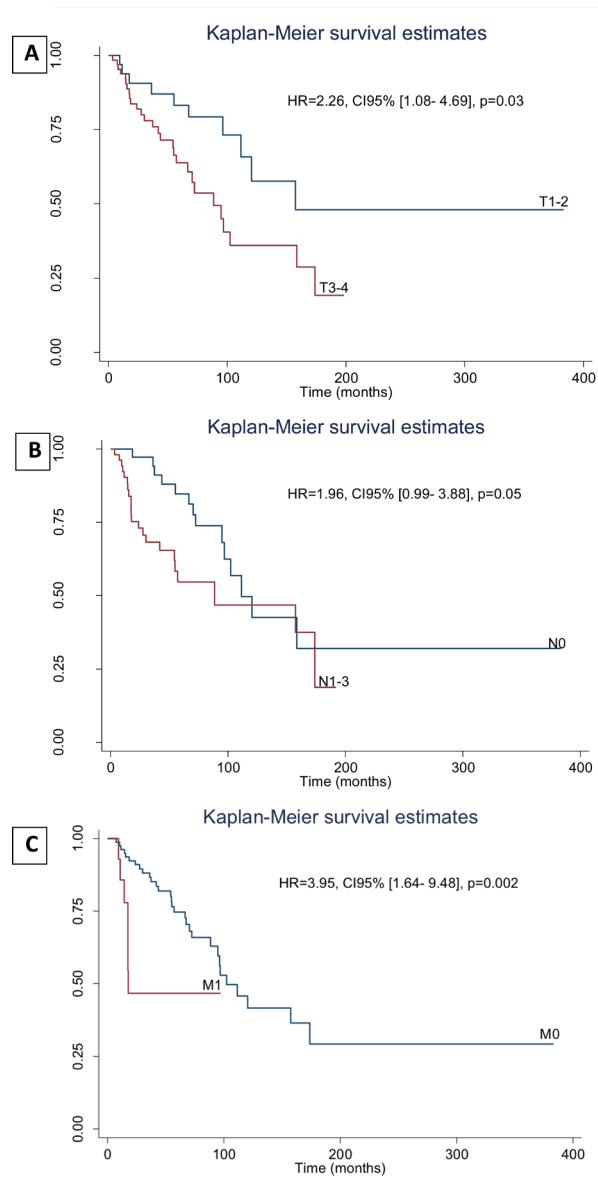

**Supplementary Figure 1: Overall survival by initial T, N and M stage.** (A) by initial T stage (reference variable for the statistical analysis (ref.): T1-2); (B) by initial N stage (ref.: N0); (C) by initial M stage (ref.: M0). HR: hazards ratio. The *P*-value was calculated by a Cox regression model.

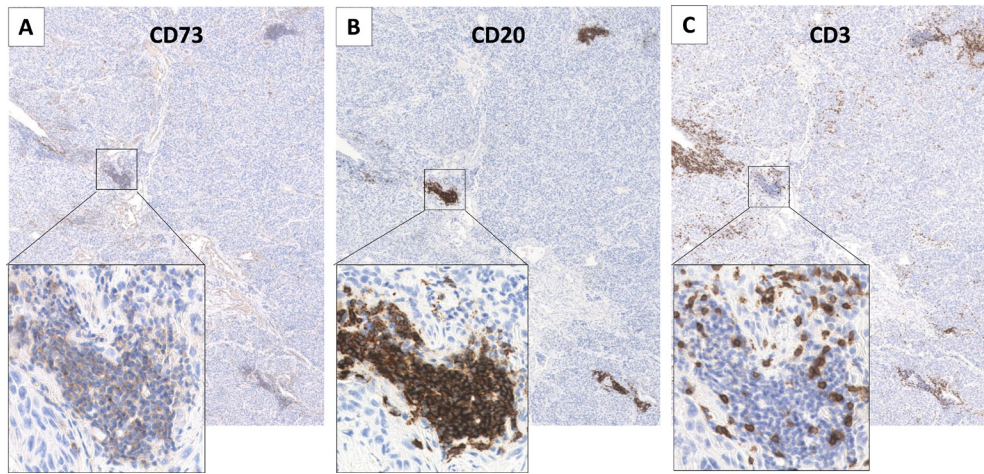

**Supplementary Figure 2: CD73, CD20 and CD3 expression in a melanoma lung metastasis.** Images A, B and C represent adjacent sections of the same melanoma lung metastasis stained with CD73, CD20 and CD3-specific antibodies, respectively. Tumor cells, occupying the majority of the image, are not immunostained (in blue). Tumor infiltrating mononuclear cells are disposed in small niches and present some CD73 (A), CD20 (B) and CD3 (C) staining (in brown). Note that CD73 staining colocalizes better with CD20 staining than with CD3 staining.

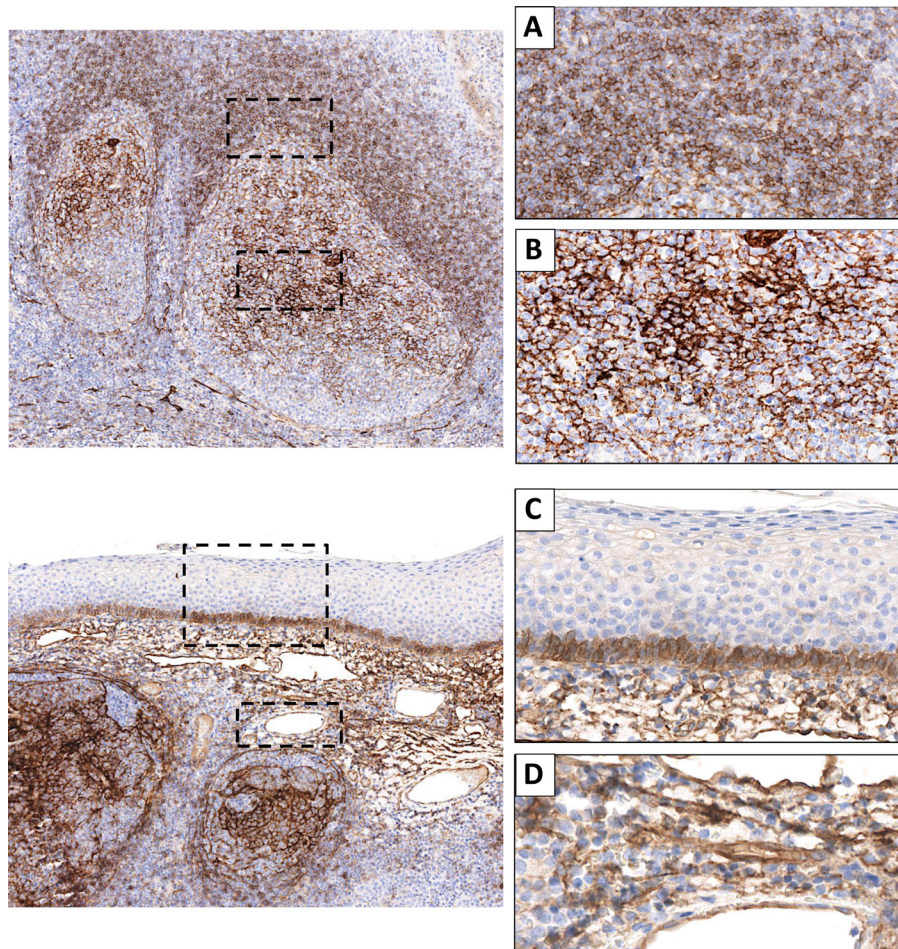

**Supplementary Figure 3: External control-Tonsil.** Staining was observed in lymphocytes of the mantle zone (with a membrane pattern - A), in germinal centers (with a follicular dendritic cell pattern - B), in the basal cell layer of the epithelium (C), in vascular and lymphatic endothelial cells and in stromal cells (D).



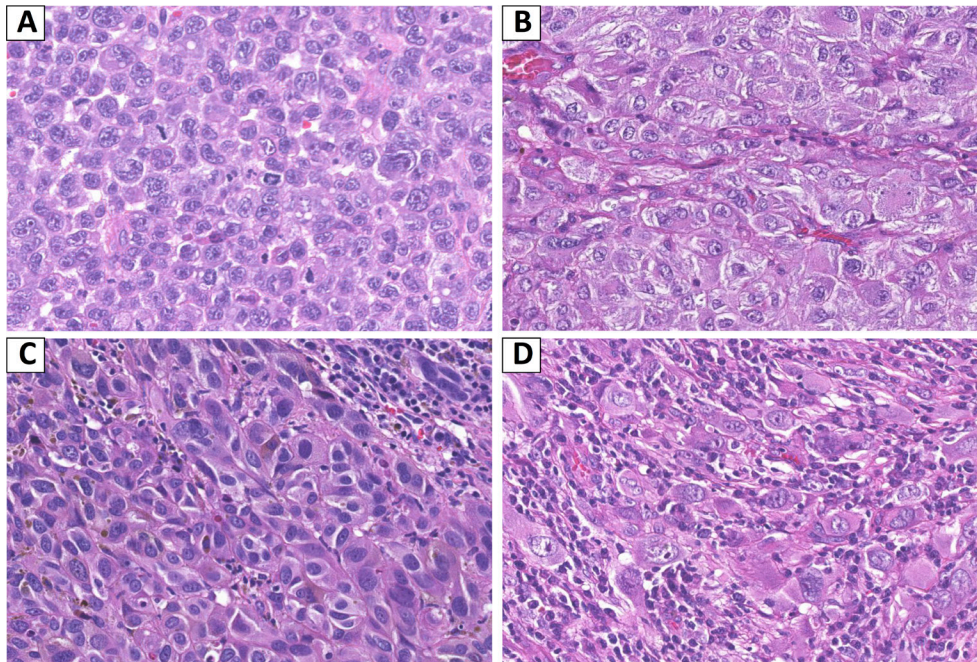

**Supplementary Figure 4: Quantification of tumor infiltrating mononuclear cells.** Samples showing none (quantity = 0- **A**) (Note: the immune cells present in this example are polymorphonuclear leukocytes), scarce (quantity = 1 - **B**), moderate (quantity = 2 - **C**) and abundant (quantity = 3 - **D**) tumor infiltrating mononuclear cells (TIMC). For lymph node metastases, only TIMC in between the tumor cells were considered, while in all other sites both intra and peritumoral TIMC were taken into account.

**Supplementary Table 1: Staining distribution of tumor cells**

| Variable                         | <i>N</i> (%) |
|----------------------------------|--------------|
| <b>Tumor cells</b>               |              |
| <b>Percentage of TC staining</b> |              |
| 0%                               | 52 (45.6%)   |
| ≤5%                              | 21 (18.4%)   |
| 5–25%                            | 13 (11.4%)   |
| 25–50%                           | 8 (7.0%)     |
| 50–75%                           | 6 (5.3%)     |
| 75–90%                           | 6 (5.3%)     |
| ≥90%                             | 8 (7.0%)     |
| <b>Intensity of TC staining</b>  |              |
| 0                                | 52 (45.6%)   |
| 1                                | 17 (14.9%)   |
| 1.5                              | 7 (6.1%)     |
| 2                                | 20 (17.5%)   |
| 2.5                              | 9 (7.9%)     |
| 3                                | 9 (7.9%)     |
| <b>H-score</b>                   |              |
| 0                                | 52 (45.6%)   |
| 2.5–37.5                         | 35 (30.7%)   |
| >37.5–285                        | 27 (23.7%)   |

Abbreviations: TC: tumor cells.

**Supplementary Table 2: Non-adjusted survival analysis of CD73 staining in tumor cells**

| Variable                     | Deceased<br>N (%) | Alive<br>N (%) | OS from diagnosis<br>HR ( <i>P</i> -value) | OS from biopsy<br>HR ( <i>P</i> -value) |
|------------------------------|-------------------|----------------|--------------------------------------------|-----------------------------------------|
| <b>% of TC stained</b>       |                   |                | <b>(0.008)</b>                             | <b>(0.001)</b>                          |
| 0 (ref.)                     | 15 (37.5%)        | 37 (50.0%)     | -                                          | -                                       |
| ≤5%                          | 10 (25.0%)        | 11 (14.9%)     | 1.37                                       | 2.54                                    |
| 5–25%                        | 1 (2.5%)          | 12 (16.2%)     | 0.20                                       | 0.26                                    |
| 25–50%                       | 4 (10.0%)         | 4 (5.4%)       | 2.59                                       | 3.21                                    |
| 50–75%                       | 4 (10.0%)         | 2 (2.7%)       | 2.89                                       | 4.28                                    |
| 75–90%                       | 0                 | 6 (8.1%)       | 2.04e-16                                   | 4.05e-15                                |
| ≥90%                         | 6 (15.0%)         | 2 (2.7%)       | 2.40                                       | 3.33                                    |
| <b>% of TC stained</b>       |                   |                |                                            |                                         |
| 0–25% (ref.)                 | 26 (65.0%)        | 60 (81.1%)     | -                                          | -                                       |
| >25%                         | 14 (35.0%)        | 14 (18.9%)     | 2.15 <b>(0.022)</b>                        | 2.03 <b>(0.033)</b>                     |
| <b>Intensity of staining</b> |                   |                | <b>(0.102)</b>                             | <b>(0.001)</b>                          |
| 0 (ref.)                     | 15 (37.5%)        | 37 (50.0%)     | -                                          | -                                       |
| 1                            | 3 (7.5%)          | 14 (18.9%)     | 0.47                                       | 0.57                                    |
| 1.5                          | 1 (2.5%)          | 6 (8.1%)       | 0.73                                       | 0.82                                    |
| 2                            | 13 (32.5%)        | 7 (9.5%)       | 2.30                                       | 5.49                                    |
| 2.5                          | 3 (7.5%)          | 6 (8.1%)       | 1.44                                       | 1.23                                    |
| 3                            | 5 (12.5%)         | 4 (5.4%)       | 1.36                                       | 2.19                                    |
| <b>Intensity of staining</b> |                   |                |                                            |                                         |
| 0–1 (ref.)                   | 18 (45.0%)        | 51 (68.9%)     | -                                          | -                                       |
| 1.5–3                        | 22 (55.0%)        | 23 (31.1%)     | 2.05 <b>(0.024)</b>                        | 2.91 <b>(0.001)</b>                     |
| <b>H-score</b>               |                   |                | <b>(0.080)</b>                             | <b>(0.045)</b>                          |
| 0 (ref.)                     | 15 (37.5%)        | 37 (50.0%)     | -                                          | -                                       |
| 2.5–37.5                     | 11 (27.5%)        | 24 (32.4%)     | 0.88                                       | 1.33                                    |
| >37.5                        | 14 (35.0%)        | 13 (17.6%)     | 2.06                                       | 2.59                                    |

Abbreviations: HR: Hazard ratio; OS: overall survival; TC: tumor cells.

ref.: variable used as the reference for the statistical analysis.

The *P*-value was calculated by a Cox regression model. *P*-values < 0.05 are in bold.

**Supplementary Table 3: Multivariable analysis of H-score**

| Variable                    | RRR  | <i>P</i> -value | Global <i>P</i> -value |
|-----------------------------|------|-----------------|------------------------|
| <b>H-score 0 (ref.)</b>     | -    | -               | <b>0.005</b>           |
| <b>H-score 2.5–37.5</b>     |      |                 |                        |
| T3-4                        | 0.38 | 0.082           |                        |
| Previous treatment          | 4.56 | <b>0.007</b>    |                        |
| <b>H-score &gt;37.5–285</b> |      |                 |                        |
| T3-4                        | 0.33 | 0.060           |                        |
| Previous treatment          | 4.81 | <b>0.009</b>    |                        |

Initial T stage and previous treatments were the variables found to be associated to the H-score at level of 20% (*P*-value < 0.20).

Abbreviations: RRR: relative risk ratio.

The *P*-value was calculated by a multinomial logistic regression model. *P*-values < 0.05 are in bold.

**Supplementary Table 4: Heterogeneity of CD73 expression in multiple melanoma metastases**

| <b>Patient</b>                              | <b>Time from diagnosis (previous treatment)</b>  | <b>First sample collection</b>                                                                            | <b>Time<sup>1</sup> (treatment<sup>2</sup>)</b> | <b>Second sample collection</b>                                                                                   | <b>Time<sup>1</sup> (treatment<sup>2</sup>)</b> | <b>Third sample collection</b>                                                                                                        |
|---------------------------------------------|--------------------------------------------------|-----------------------------------------------------------------------------------------------------------|-------------------------------------------------|-------------------------------------------------------------------------------------------------------------------|-------------------------------------------------|---------------------------------------------------------------------------------------------------------------------------------------|
| <b>Patient 1</b><br>Cutaneous               | 16 months<br>(RT)                                | <b>Right lung</b><br>(pleural invasion)<br>TC 75–90%<br>TIMC 0                                            | 11 months<br>(anti-CTLA4)                       | <b>Right pleura</b><br>TC ≥90%<br>TIMC 0                                                                          | –                                               | –                                                                                                                                     |
| <b>Patient 2</b><br>Cutaneous               | 3 months<br>(None)                               | <b>SCT (left inguinal)</b><br>TC ≤5%<br>TIMC 0                                                            | 7 months<br>(None)                              | <b>Left inguinal LN</b><br>TC 0<br>TIMC 0                                                                         | –                                               | –                                                                                                                                     |
| <b>Patient 3</b><br>Cutaneous               | 62 months<br>(None)                              | <b>Skin (right breast)</b><br>TC 0<br>TIMC 0                                                              | 6 months<br>(None)                              | <b>Skin (right breast)</b><br>TC 0<br>TIMC 0                                                                      | 3 months<br>(None)                              | <b>Skin (right breast)</b><br>TC 0<br>TIMC 0<br><b>Skin (right hip)</b><br>TC 0<br>TIMC 0<br><b>Right thorax LN</b><br>TC 0<br>TIMC 0 |
| <b>Patient 4</b><br>Cutaneous               | 34 months<br>(None)                              | <b>Skin (left breast)</b><br>TC 0<br>TIMC 0                                                               | 3 months<br>(None)                              | <b>Skin (left breast)</b><br>TC 0<br>TIMC ≤5%                                                                     | 2 months<br>(None)                              | <b>Skin (left breast)</b><br>TC 0<br>TIMC 0                                                                                           |
| <b>Patient 5</b><br>Cutaneous               | 24 months<br>(None)                              | <b>Left axillary LN</b><br>(effraction)<br>TC 5–25%<br>TIMC 0<br><b>Skin (back)</b><br>TC 0<br>TIMC 5–25% | 7 months<br>(None)                              | <b>Skin (left axillary)</b><br>TC 25–50%<br>TIMC 5–25%                                                            | –                                               | –                                                                                                                                     |
| <b>Patient 6</b><br>Cutaneous               | 64 months<br>(None)                              | <b>Left tibia SCT</b><br>TC 0<br>TIMC ≤5%                                                                 | 38 months<br>(None)                             | <b>Left tibia SCT</b><br>TC 0<br>TIMC 0                                                                           | –                                               | –                                                                                                                                     |
| <b>Patient 7</b><br>Cutaneous               | 45 months<br>(CT, RT, dabrafenib,<br>anti-CTLA4) | <b>Skin (jaw)</b><br>TC ≤5%<br>TIMC 0                                                                     | 8 months<br>(CT, dabrafenib,<br>trametinib)     | <b>Skin (jaw)</b><br>TC ≥90%<br>TIMC 0<br><b>Lung</b><br>TC 75–90%<br>TIMC 0<br><b>Heart</b><br>TC ≥90%<br>TIMC 0 | –                                               | –                                                                                                                                     |
| <b>Patient 8</b><br>Unknown primary<br>site | 0 months<br>(None)                               | <b>Skin (frontal)</b><br>TC 0<br>TIMC ≤5%<br><b>Left inguinal LN</b><br>TC 0<br>TIMC 0                    | –                                               | –                                                                                                                 | –                                               | –                                                                                                                                     |
| <b>Patient 9</b><br>Cutaneous               | 24 months<br>(None)                              | <b>Skin (right ankle)</b><br>TC 0<br>TIMC 0<br><b>Right inguinal LN</b><br>TC 0<br>TIMC 0                 | 22 months<br>(RT, CT)                           | <b>Brain</b><br>TC 0<br>TIMC 0                                                                                    | –                                               | –                                                                                                                                     |

Autopsy

|                      |                                |                             |                                                       |                            |   |   |
|----------------------|--------------------------------|-----------------------------|-------------------------------------------------------|----------------------------|---|---|
| <b>Patient 10</b>    | 144 months                     | <b>Lung</b>                 | –                                                     | –                          | – | – |
| Cutaneous            | (CT, Melan-A, INF-alpha)       | TC ≤5%                      |                                                       |                            |   |   |
|                      |                                | TIMC 0                      |                                                       |                            |   |   |
|                      |                                | <b>Left flank LN</b>        |                                                       |                            |   |   |
|                      |                                | TC 0                        |                                                       |                            |   |   |
|                      |                                | TIMC 0                      |                                                       |                            |   |   |
| <b>Patient 11</b>    | 88 months                      | <b>Skin (left inguinal)</b> | –                                                     | –                          | – | – |
| Cutaneous            | (CT, INF-alpha)                | TC 0                        |                                                       |                            |   |   |
|                      |                                | TIMC 0                      |                                                       |                            |   |   |
|                      |                                | <b>Aortic LN</b>            |                                                       |                            |   |   |
|                      |                                | TC ≤5%                      |                                                       |                            |   |   |
|                      |                                | TIMC 0                      |                                                       |                            |   |   |
| <b>Patient 12</b>    | 5 months                       | <b>Left axillary LN</b>     | 19 months                                             | <b>Intestine</b>           | – | – |
| Cutaneous            | (None)                         | TC 0                        | (Anti-CTLA4)                                          | TC 75–90%                  |   |   |
|                      |                                | TIMC ≤5%                    |                                                       | TIMC ≤5%                   |   |   |
| <b>Patient 13</b>    | 1 month                        | <b>Right inguinal LN</b>    | 19 months                                             | <b>Breast</b>              | – | – |
| Unknown primary site | (None)                         | TC 0                        | (RT)                                                  | TC ≤5%                     |   |   |
|                      |                                | TIMC ≤5%                    |                                                       | TIMC 25–50%                |   |   |
| <b>Patient 14</b>    | 20 months                      | <b>Liver</b>                | 14 months                                             | <b>Intestine</b>           | – | – |
| Ocular               | (RT, bevacizumab)              | TC 0                        | (RT, anti-CTLA4)                                      | TC 25–50%                  |   |   |
|                      |                                | TIMC 0                      |                                                       | TIMC 0                     |   |   |
| <b>Patient 15</b>    | 110 months                     | <b>Left inguinal LN</b>     | 6 months                                              | <b>Skin (right thigh)</b>  | – | – |
| Cutaneous            | (RT, CT, anti-CTLA4, anti-PD1) | TC 0                        | (None)                                                | TC 25–50%                  |   |   |
|                      |                                | TIMC 0                      |                                                       | TIMC 0                     |   |   |
| <b>Patient 16</b>    | 13 months                      | <b>Skin (right torso)</b>   | 23 months                                             | <b>Skin (right thorax)</b> | – | – |
| Unknown primary site | (Anti-CTLA4)                   | TC 50–75%                   | (RT, CT, anti-CTLA4, anti-PD, dabrafenib, trametinib) | TC 0                       |   |   |
|                      |                                | TIMC 5–25%                  |                                                       | TIMC 5–25%                 |   |   |

Abbreviations: CT: chemotherapy; LN: lymph node; RT: radiotherapy; SCT: subcutaneous tissue.

1. Time between the two sample collections. 2. Treatment received between the two sample collections.

Patients 1-7: same lesion biopsied at different times. Patients 3, 5, 7-11: different lesions biopsied at the same time (or less than 1 month apart). Patients 9, 12-16: different lesions biopsied at different times.
